# Supplementary material
Source: MDPI journal article supplement (https://www.mdpi.com/2297-8739/10/3/202)
Supplement: s1 [file s1]

## **Supplementary material**

# **Development and Validation of a Confirmatory Method for the Determination of 12 Coccidiostat Residues in Eggs and Muscle by Means of Liquid Chromatography Coupled to Hybrid High Resolution Mass Spectrometry**

**Federica Castellani, Matteo Ricci, Maria Novella Colagrande, Giampiero Scortichini and Giorgio Saluti \***

Istituto Zooprofilattico Sperimentale dell'Abruzzo e del Molise "G. Caporale", Via Campo Boario,  
64100 Teramo, Italy

\* Correspondence: [g.saluti@izs.it](mailto:g.saluti@izs.it)

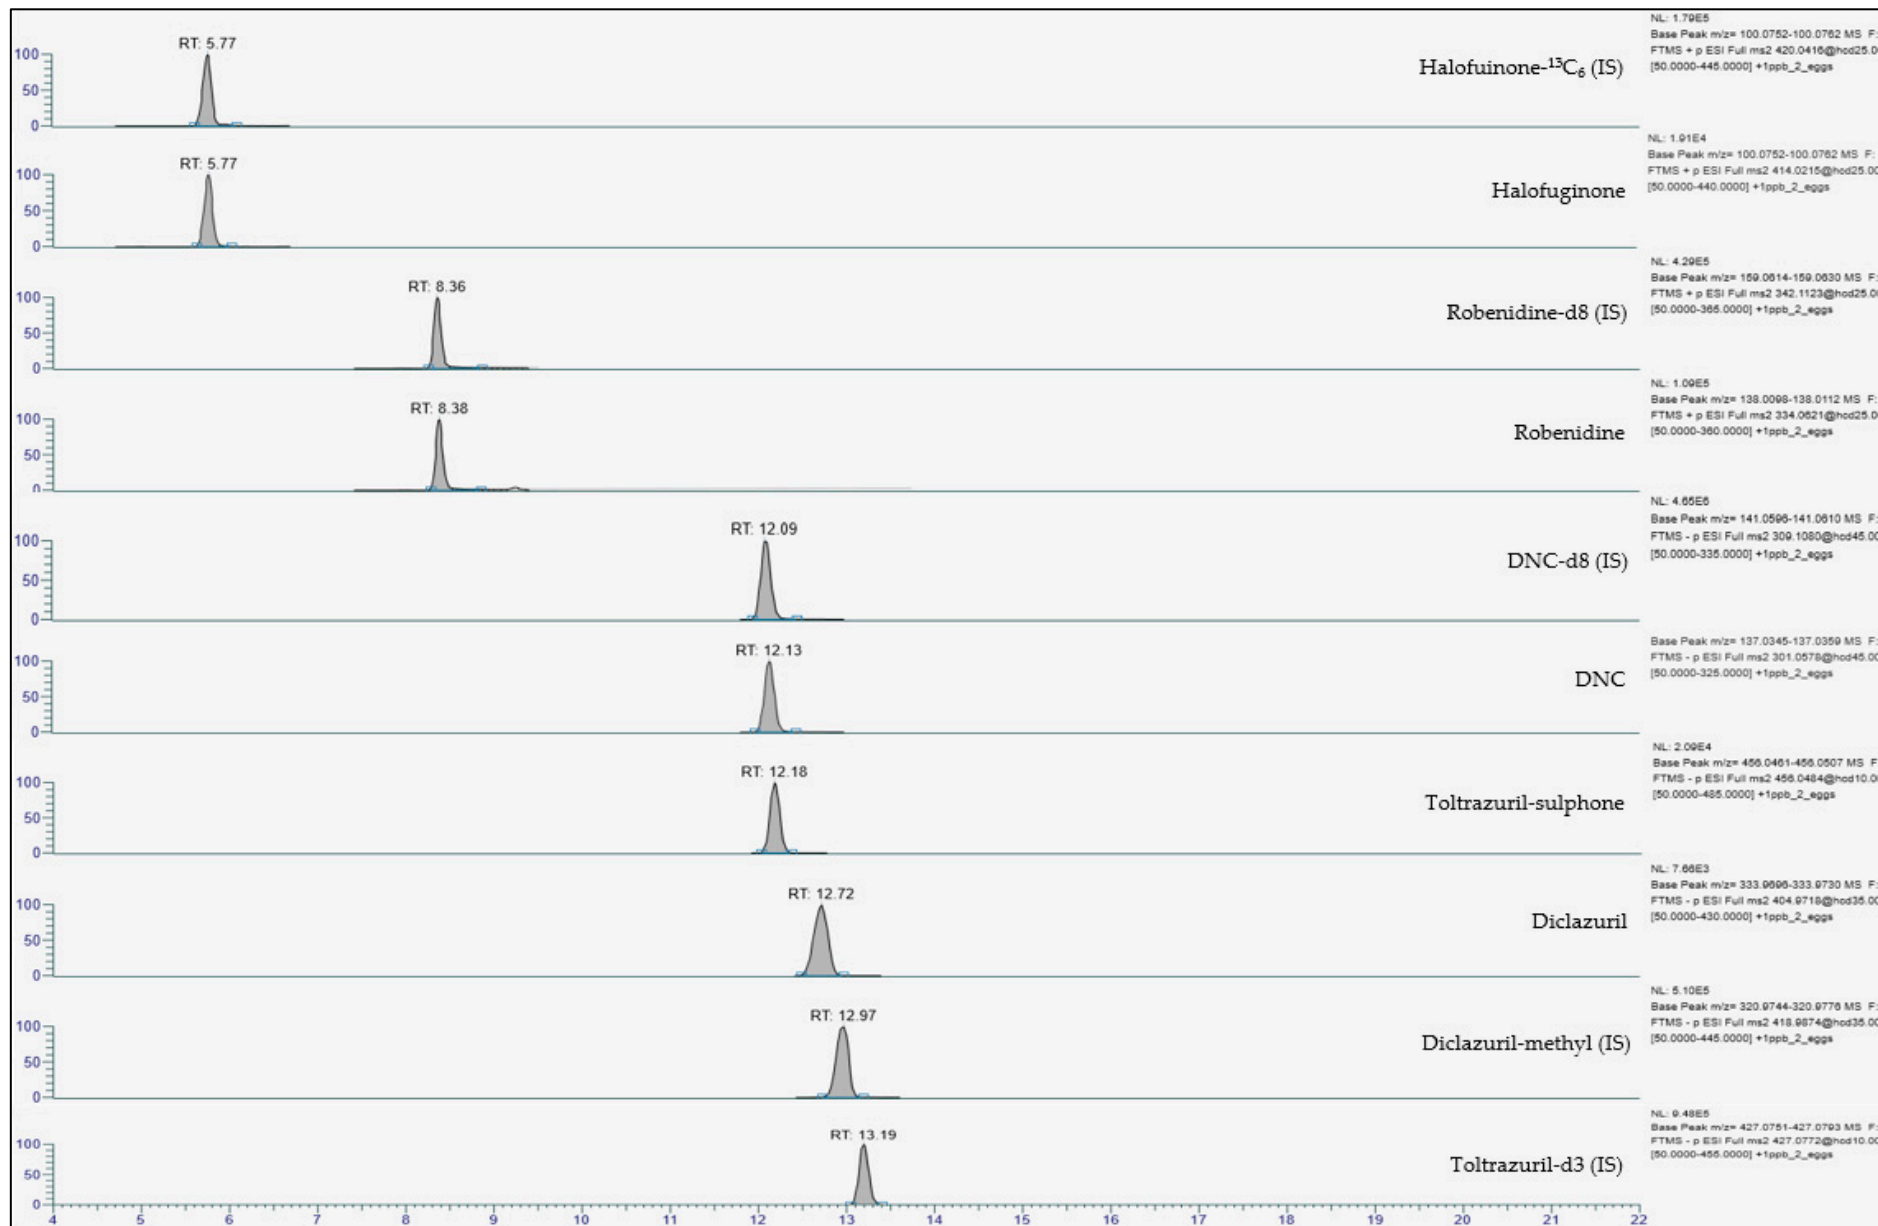

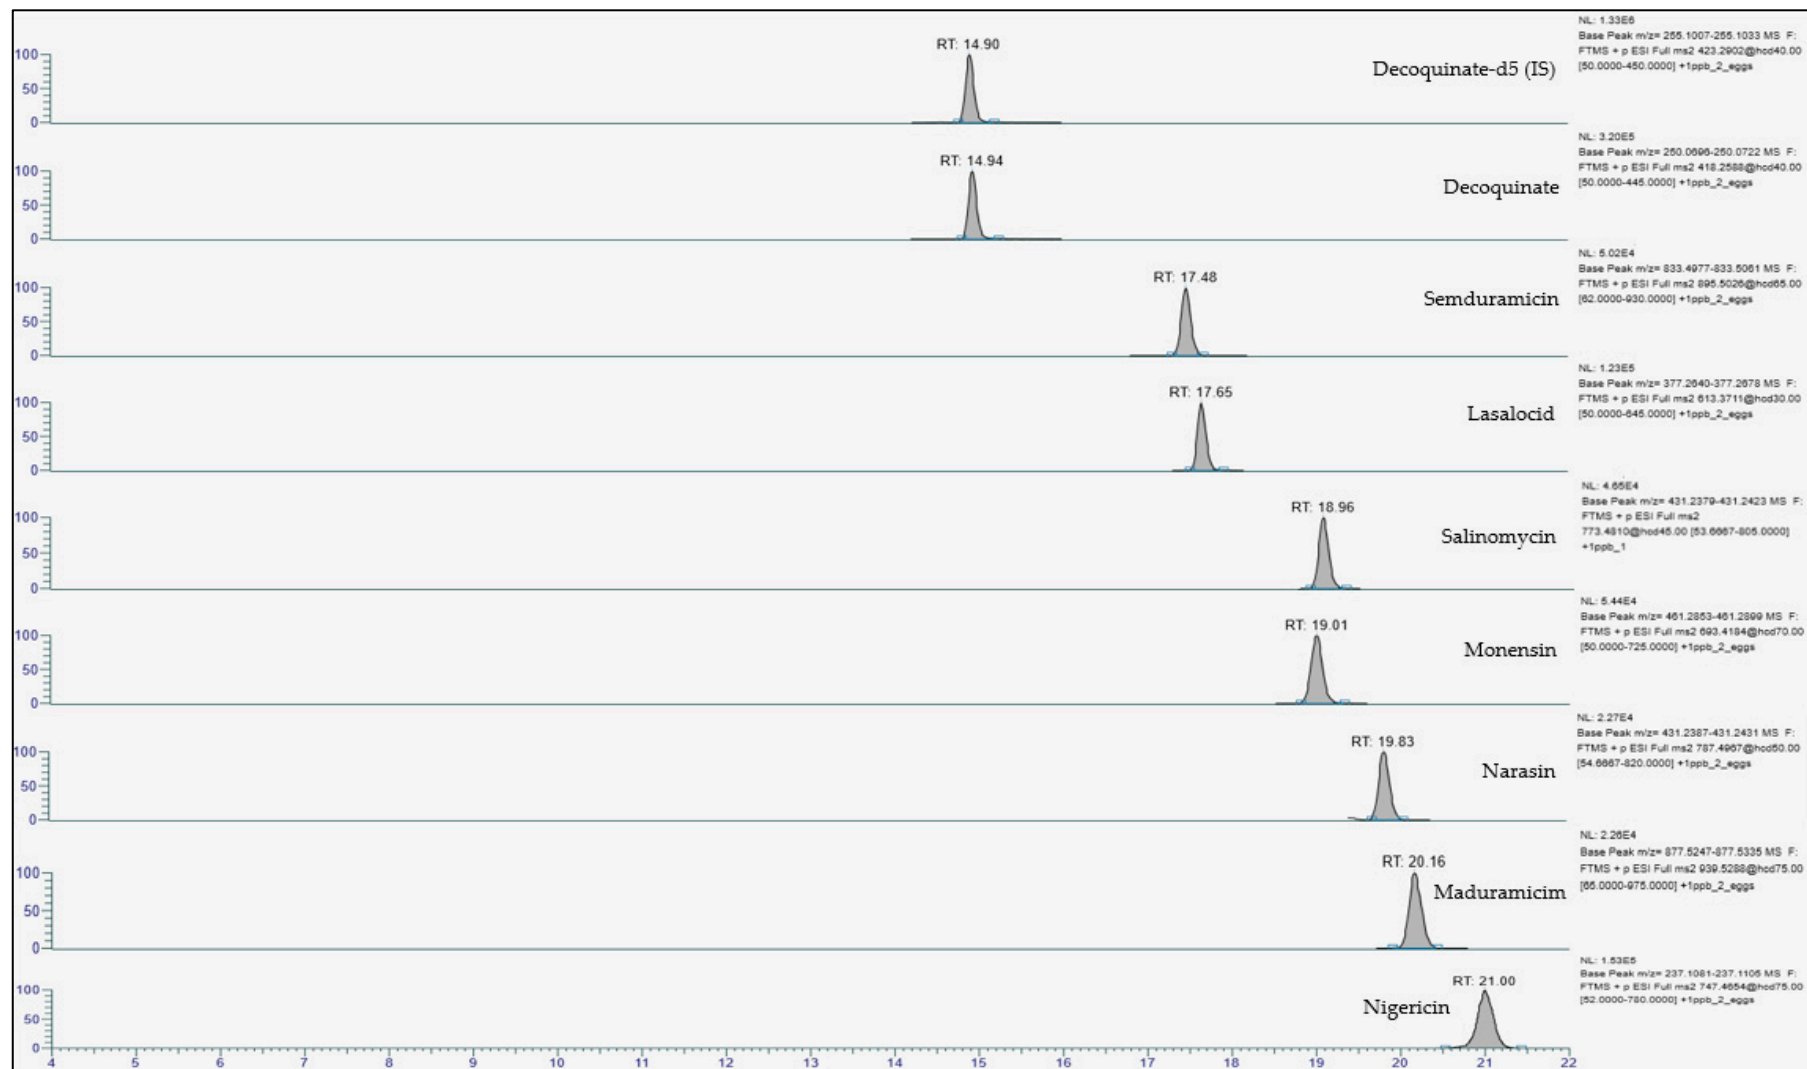

**Figure S1.** Chromatogram of an egg sample spiked at 1 µg kg<sup>-1</sup>.

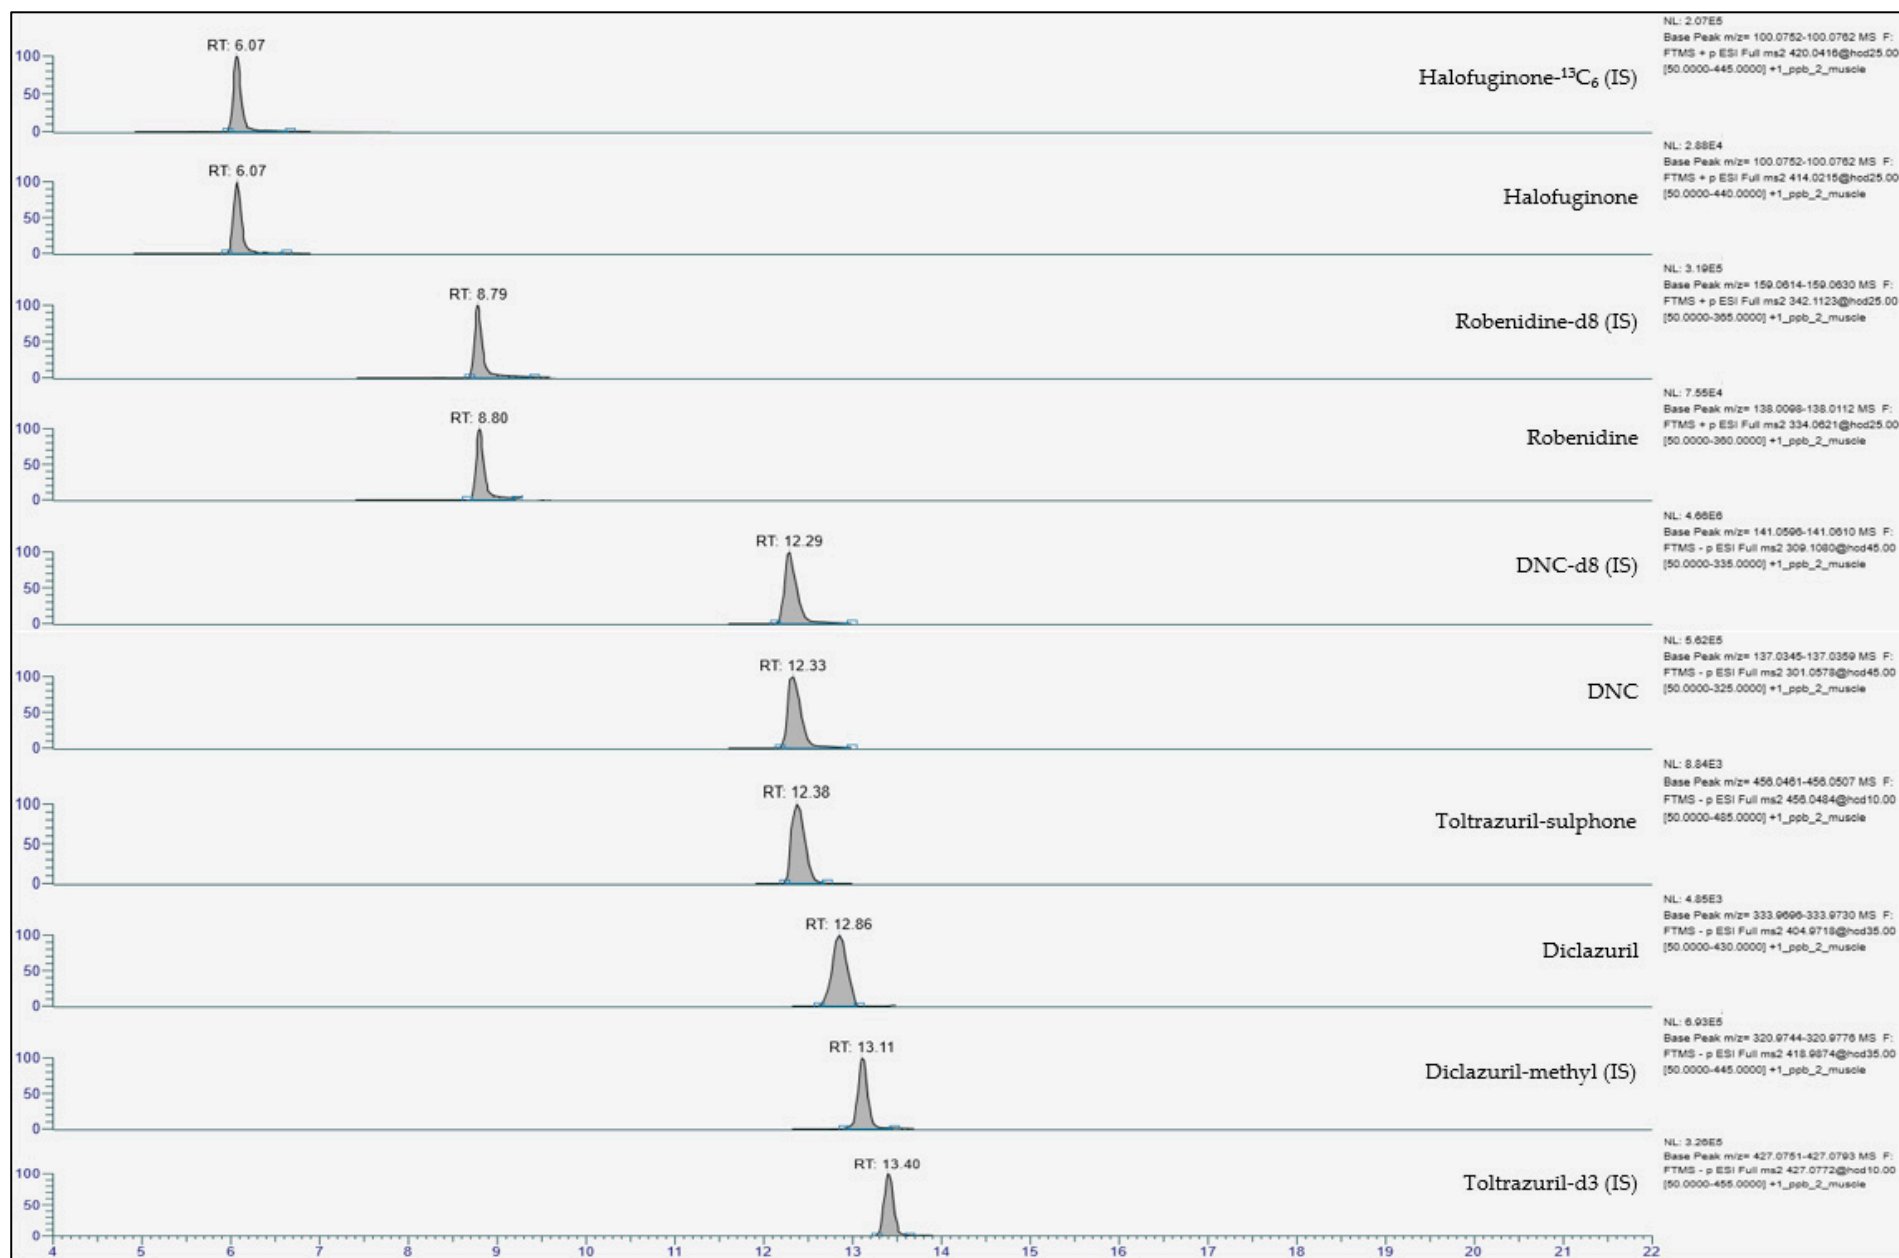

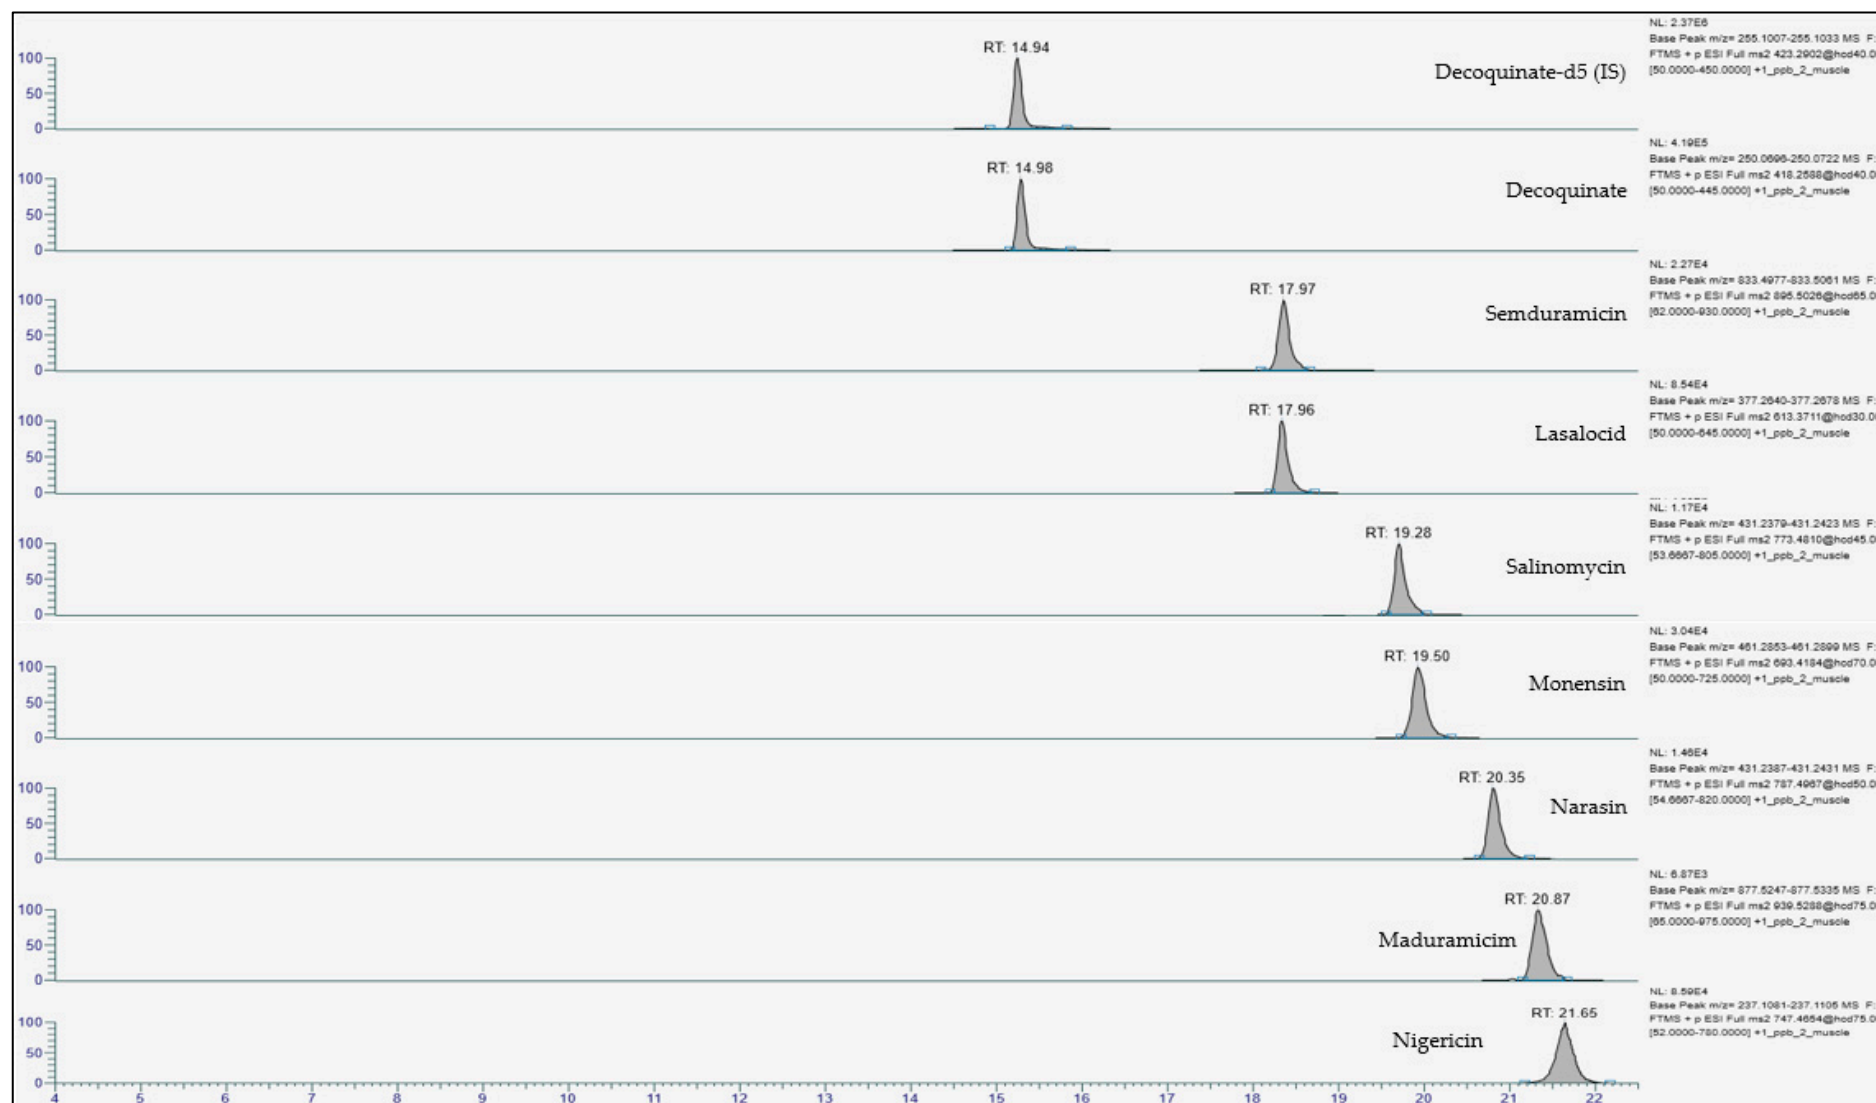

Figure S2. Chromatogram of a poultry muscle sample spiked at 1 µg kg<sup>-1</sup>.
